# Supplementary material for: Interoceptive signals and emotional states shape temporal perception through heart rate modulation
Source: Front Psychol. 2025 Jul 3;16:1610347. doi: 10.3389/fpsyg.2025.1610347 (PMC12267279; doi:10.3389/fpsyg.2025.1610347)
Supplement: Supplementary file 1 [file Table_1.XLSX]

## Sheet: all
video ID	valence (1-9), mean	arousal (1-9), mean	valence, SD	arousal, SD	category	no, of raters	duration, s	link	video timeline
156	2.43	6.4	1.85	1.24	negative	30	60	Movie (Jojo Rabbit)	1:18,30-1:19,30
39	2.43	6.07	2.24	0.9	negative	30	60	https://youtu,be/OInh0tIM8ds?t=365	6:05-7:05
58	2.43	5.9	2.32	1.64	negative	30	61	https://youtu,be/Mr2KkLoL8Mo?t=335	5:35-6-36
47	2.43	6.13	1.68	1.15	negative	30	60	https://youtu,be/1m7q8GpGpJ0?t=230	3:50-4:50
43	2.53	5.83	2.28	1.74	negative	30	60	https://youtu,be/OInh0tIM8ds?t=721	12:01-13:01
57	2.53	6.37	3.12	2.52	negative	30	60	https://youtu,be/FqdE8y14sxE?t=220	3:40-4:40
70	2.6	5.8	2.26	1.72	negative	30	63	Movie (Prometheus)	1:24,15-1:25,18
186	2.67	5.73	2.26	1.35	negative	30	65	https://youtu,be/70RCrOJ9_p8?t=57	0:57-2:02
119	2.73	5.7	2.14	1.78	negative	30	60	https://vk,com/video-37948240_167173495	0:00-1:00
85	2.8	5.63	2.35	1.73	negative	30	61	https://youtu,be/qKpLOfgwpsU?t=28	0:28-1:29
55	2.8	6.07	2.13	1.66	negative	30	60	https://dzen,ru/video/watch/61dd730475c0aa5bcfd3bb7f?f=video&utm_referer=yandex,ru	0:06-1:06
128	2.87	5.93	2.78	2.1	negative	30	60	https://www,youtube,com/watch?v=BAafj--lRW0&t=26s	0:00-0:40+1:12-1:32
41	4.43	4	2.28	1.72	neutral	30	61	https://www,youtube,com/watch?v=fBqjDEwC1M4	14:50-15:51
106	4.57	3.53	1.82	0.72	neutral	30	62	https://youtu,be/GC29oAMn70o?t=99	1:39-2:41
185	4.57	4.03	2.04	1.64	neutral	30	60	https://youtu,be/1UHKvcMfJGU	0:00-0:30 (x2 loop)
94	4.73	5.2	2.36	1.97	neutral	30	60	https://youtu,be/LWOb8k0kbXY	0:00-1:00
8	4.8	3.3	2.05	1.08	neutral	30	60	https://www,youtube,com/watch?v=ZZngaztlz8o&ab_channel=TRAINS24	2:39-3:39
4	4.83	2.63	1.8	0.54	neutral	30	60	https://www,youtube,com/watch?v=zjh9xS2EFkY	0:00-1:00
120	4.97	3.6	1.54	1.18	neutral	30	60	https://youtu,be/NyeOIaG1C5U	0:00-1:00
1	5	3.03	1.64	0.87	neutral	30	64	https://www,youtube,com/watch?v=TnEvxiwR1ag	2:00-3:04
211	5.13	4.4	1.86	1.39	neutral	30	61	https://youtu,be/1mIM-wZiBck?t=17	0:17-1:18
9	5.17	3.37	1.92	1.23	neutral	30	60	https://www,youtube,com/watch?v=mOzMsaIReyA&ab_channel=%D0%98%D1%80%D0%B8%D0%BD%D0%B0%D0%94%D1%83%D0%B3%D0%B8%D0%BD%D0%B5%D1%86	0:11-1:11
11	5.17	4.53	2.31	1.49	neutral	30	60	https://www,youtube,com/watch?v=TsdzbF4uiaA&ab_channel=VIPAKLtd	0:11-1:11
173	5.27	4.1	2.06	1.31	neutral	30	62	https://www,youtube,com/watch?v=qPI3L28na-A	0:11-0:26 (compiled)
125	7.17	5.97	2.16	1.54	positive	30	61	https://youtu,be/20Ap1kH8wuU?t=63	1:03-2:04
149	7.2	5.73	2.29	1.65	positive	30	63	https://youtu,be/yxS6or7fpvg	0:00-1:03
15	7.2	5.3	2.39	1.55	positive	30	61	https://youtu,be/uCNWuSbPnt4?t=220	3:40-4:41
81	7.2	5.9	2.09	1.82	positive	30	60	https://youtu,be/Brc9WRd6yKg	0:00-1:00
13	7.23	5.93	2.03	1.23	positive	30	60	https://www,youtube,com/watch?v=egW6BZAjfuE	8:09-9:09
130	7.27	5.93	1.79	1.15	positive	30	62	https://youtu,be/y3zv2O0b4rA?t=17	0:17-1:19
163	7.37	5.9	1.95	1.31	positive	30	60	https://videezy,com/	0:00-1:00
72	7.43	6.47	1.97	1.3	positive	30	60	https://www,youtube,com/watch?v=1mf06IwdpVM	0:00-1:00
79	7.47	6.13	1.93	1.55	positive	30	62	https://youtu,be/Mx_7uZhKL84?t=38	0:38-1:40
21	7.57	5.97	2.15	1.3	positive	30	60	https://youtu,be/1oM3Q6vNgtM	0:00-1:00
74	7.67	6.23	1.83	1.43	positive	30	60	https://youtu,be/BK65XwvEdh0	0:00-1:00
86	7.8	6.8	1.69	1.02	positive	30	61	https://youtu,be/8rSH8-pbHZ0?t=7	0:07-1:09

## Sheet: men
video ID	valence (1-9), mean	arousal (1-9), mean	valence, SD	arousal, SD
156	3.27	5.36	1.27	1.91
39	2.64	5.09	0.92	2.55
58	3.14	6.14	1.46	2.61
47	3.29	4.86	1.25	2.12
43	2.8	3.8	1.1	2.17
57	1.67	7	0.82	2.1
70	3.5	6.33	2.88	2.07
186	3	4.91	1.34	2.59
119	2.86	5.29	1.68	1.8
85	4.45	4.45	1.63	2.02
55	2.56	6	1.24	1.73
128	3.45	5.91	2.7	3.08
41	5.18	3.82	1.72	2.44
106	4.4	2.4	0.89	1.67
185	4.71	3.71	1.11	1.5
94	4	4.45	1.48	2.66
8	5.09	3.27	1.04	1.68
4	4.82	2.45	0.75	1.92
120	5.14	3.14	0.9	1.46
1	5.18	3.18	0.6	1.47
211	5.56	4.67	1.33	1.41
9	5.6	3.2	1.34	1.79
11	4.56	5	1.13	2.24
173	5.44	4.11	1.67	2.57
125	7.11	6.56	2.03	2.6
149	6.45	5.27	2.16	2.69
15	6.5	3.5	1.76	1.87
81	6.71	5.29	2.21	1.8
13	6.82	5.73	1.17	2.24
130	6.5	5.5	1.05	1.64
163	7.09	5.73	1.51	1.9
72	7.55	6.73	1.29	2.1
79	7	6.17	2.1	1.6
21	7.27	5.45	1.56	2.11
74	7	5.18	1.73	1.83
86	7.82	7.18	1.08	1.78

## Sheet: women
video ID	valence (1-9), mean	arousal (1-9), mean	valence, SD	arousal, SD
156	1.95	7	0.97	1.63
39	2.32	6.63	1.45	1.83
58	2.22	5.83	1.65	2.23
47	2.17	6.52	0.98	1.38
43	2.48	6.24	1.87	2.07
57	2.75	6.21	2.75	3.3
70	2.38	5.67	1.24	2.28
186	2.47	6.21	1.47	1.93
119	2.7	5.83	1.82	2.21
85	1.84	6.32	0.96	2.31
55	2.9	6.1	1.81	2.28
128	2.53	5.95	1.87	2.59
41	4	4.11	1.6	2.18
106	4.6	3.76	0.71	1.79
185	4.52	4.13	1.78	2.16
94	5.16	5.63	2.14	2.06
8	4.63	3.32	1.07	2.26
4	4.84	2.74	0.37	1.76
120	4.91	3.74	1.28	1.54
1	4.89	2.95	1.1	1.72
211	4.95	4.29	1.5	2.03
9	5.08	3.4	1.19	1.96
11	5.43	4.33	1.78	2.33
173	5.19	4.1	1.17	1.95
125	7.19	5.71	1.33	1.95
149	7.63	6	1.16	2.13
15	7.38	5.75	1.53	2.29
81	7.35	6.09	1.72	2.13
13	7.47	6.05	1.26	1.96
130	7.46	6.04	1.14	1.81
163	7.53	6	1.22	2.11
72	7.37	6.32	1.34	2.16
79	7.58	6.13	1.41	2.01
21	7.74	6.26	1.15	2.23
74	8.05	6.84	1.13	1.64
86	7.79	6.58	1.03	1.68
