# Supplementary material for: Interoceptive signals and emotional states shape temporal perception through heart rate modulation
Source: Front Psychol. 2025 Jul 3;16:1610347. doi: 10.3389/fpsyg.2025.1610347 (PMC12267279; doi:10.3389/fpsyg.2025.1610347)
Supplement: Supplementary file 2 [file Table_2.XLSX]

## Sheet: Video
video_id	estimation_error	est_like	HR	z_score_HR
1.mp4	-0.264172	4.97222	80.4613	0.164089
106.mp4	-0.235374	4.42857	80.9744	0.611522
11.mp4	-0.244048	5.69444	79.0471	-0.216595
119.mp4	-0.263228	3.19444	79.4219	-0.20569
120.mp4	-0.20068	5.66667	78.6944	-0.403522
125.mp4	-0.131653	6.58824	80.7939	0.467035
128.mp4	-0.292857	3.61111	77.8246	-0.483948
13.mp4	0.181818	7.36364	77.4329	0.456125
130.mp4	-0.126448	7.16216	79.6337	-0.0154709
149.mp4	-0.0070028	6.05882	79.8319	0.225446
15.mp4	-0.257653	7.34286	78.9126	-0.230997
156.mp4	-0.30873	2.83333	80.3575	0.0930595
163.mp4	-0.283382	7.71429	78.6766	-0.0162301
173.mp4	-0.230373	4.81081	79.4665	0.0446392
185.mp4	-0.303571	5	80.079	-0.0485533
186.mp4	-0.309524	3.05405	78.5385	-0.529449
21.mp4	-0.24127	7.44444	80.7348	0.167858
211.mp4	-0.338095	5.30556	79.8535	-0.0349825
39.mp4	-0.206803	2.85714	81.1145	0.372498
4.mp4	-0.267857	4.97222	80.6946	0.499303
41.mp4	-0.243537	4.77143	81.5553	0.434067
43.mp4	-0.343074	2.9697	80.5804	0.31983
47.mp4	-0.248397	2.11429	78.9193	-0.380965
55.mp4	-0.335714	2.08571	79.2035	-0.325275
57.mp4	-0.305102	2.14286	78.8033	-0.146635
58.mp4	-0.31746	3.22222	78.9131	-0.362699
70.mp4	-0.294558	2.77143	76.8252	-0.836276
72.mp4	-0.154862	7.41176	80.0978	-0.00391136
74.mp4	-0.224868	8.08333	80.4383	0.149179
79.mp4	-0.326891	8.14706	79.226	0.0417729
8.mp4	-0.318452	5.05556	81.57	0.442602
81.mp4	-0.263996	7.62162	80.2364	0.095524
85.mp4	-0.254082	3.54286	77.2762	-0.802363
86.mp4	-0.261243	8.08333	80.291	0.160326
9.mp4	-0.305042	5.05882	80.2166	0.0547819
94.mp4	-0.291327	5.34286	80.2843	0.0900897
